# Supplementary material for: Regulating the kinetic behaviours of polysulfides by designing an Au–COF interface in lithium–sulfur batteries
Source: Royal Society of Chemistry journal article supplement (doi:10.1039/d3ta05859j), 2023-11-21
Supplement: d3ta05859j1.pdf [file d3ta05859j1.pdf]

## Supplementary Information (SI)

### **Regulating the Kinetic Behaviors of Polysulfides by Designing an Au-COF Interface in Lithium-Sulfur Batteries**

Chan Li, Ke Yang, Zelin Ma, Fei Zhao, Juan Li, Xinwu Xu, Xiaoyu Hao, Haoyuan Qi, Yibo He\*

State Key Laboratory of Solidification Processing, Center of Advanced Lubrication and Seal Materials, School of Materials Science and Engineering, Northwestern Polytechnical University, Youyi Road 127#, Xi'an 710072, Shaanxi, P. R. China.

\*Corresponding author. E-mail: [heyibo@nwpu.edu.cn](mailto:heyibo@nwpu.edu.cn)

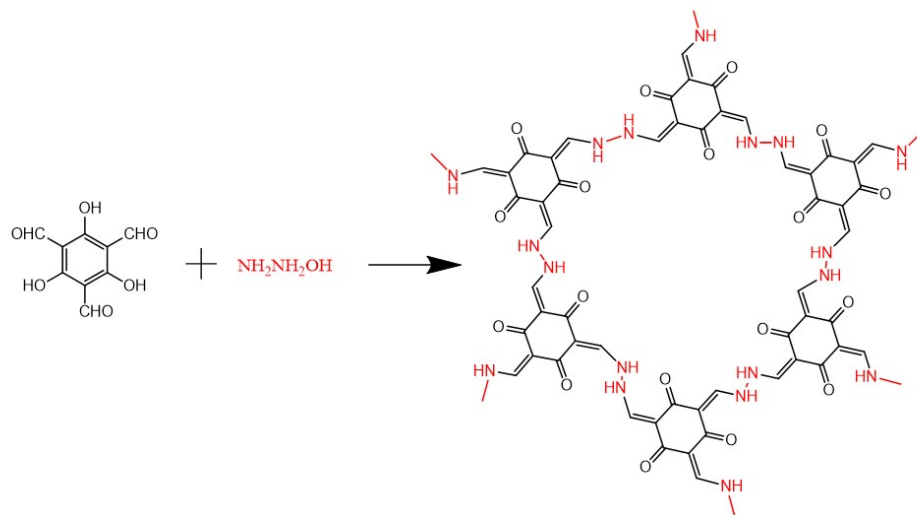

**Fig. S1** Synthetic scheme of the NUS-2.

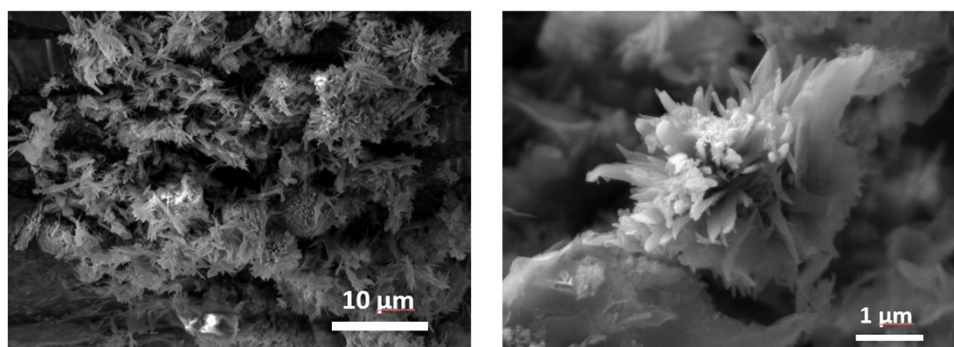

**Fig. S2** SEM images of NUS-2 powder at different magnifications.

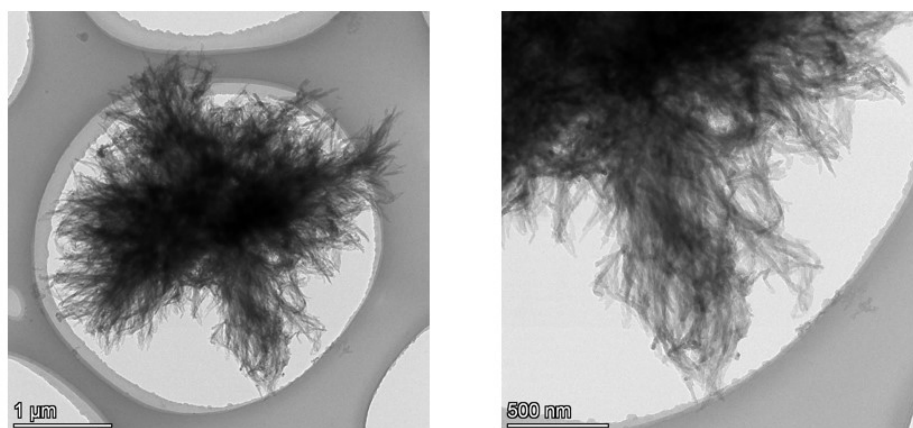

**Fig. S3** TEM images of NUS-2 powder at different magnifications.

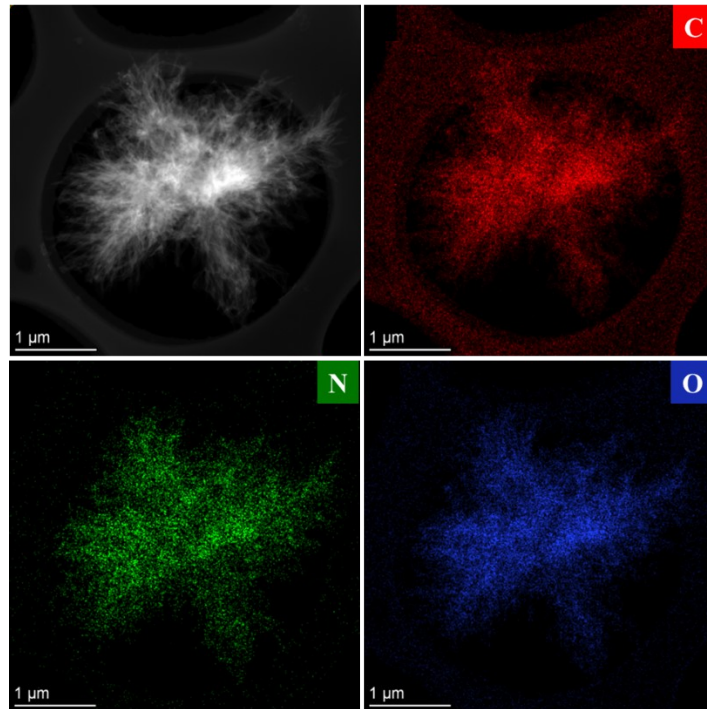

**Fig. S4** TEM and corresponding elemental mapping images of NUS-2 powder.

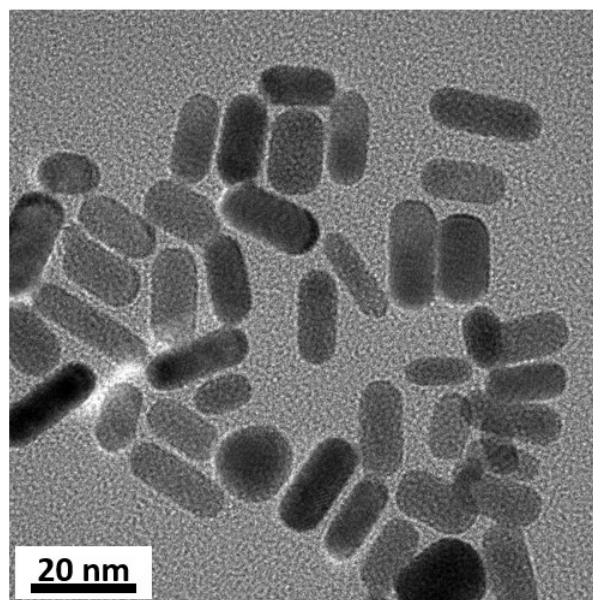

**Fig. S5** TEM image of Au NPs.

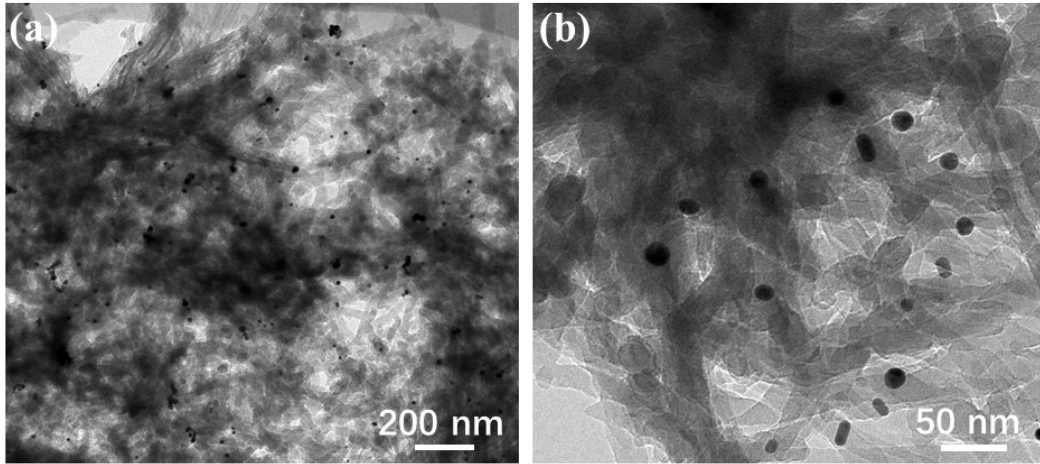

Fig. S6 TEM images of Au-COF at different magnification.

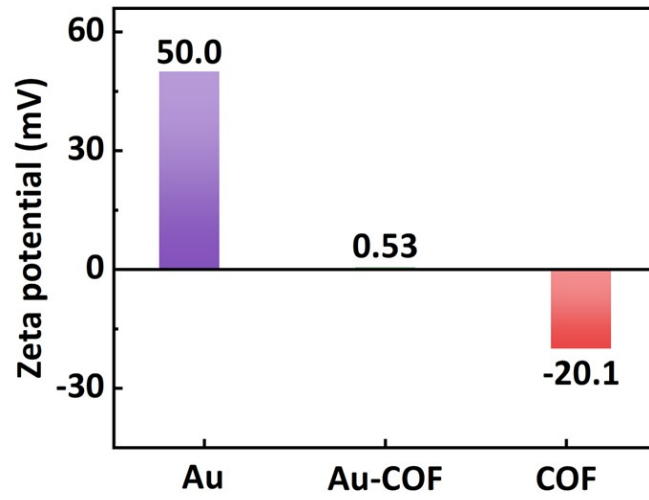

Fig. S7 Zeta Potential of various materials.

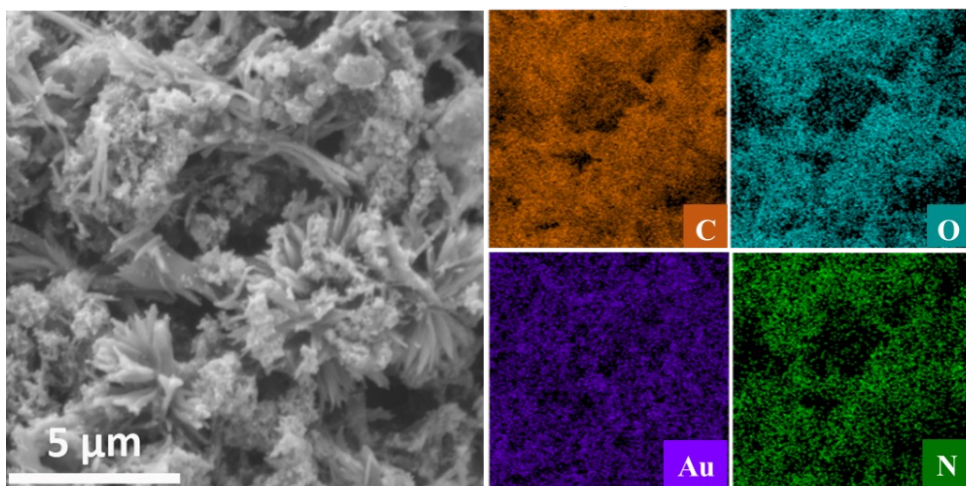

**Fig. S8** SEM and corresponding elemental mapping images of Au-COF/rGO powder.

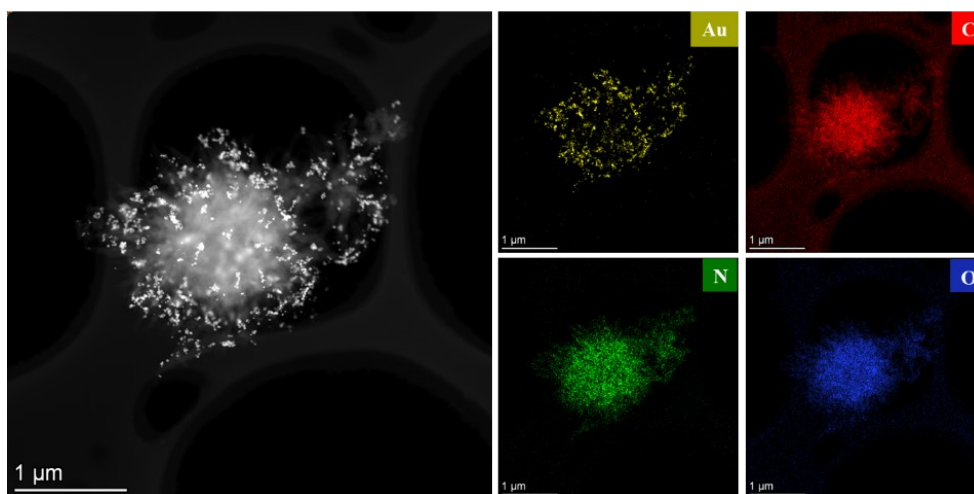

**Fig. S9** TEM and corresponding elemental mapping images of Au-COF/rGO powder.

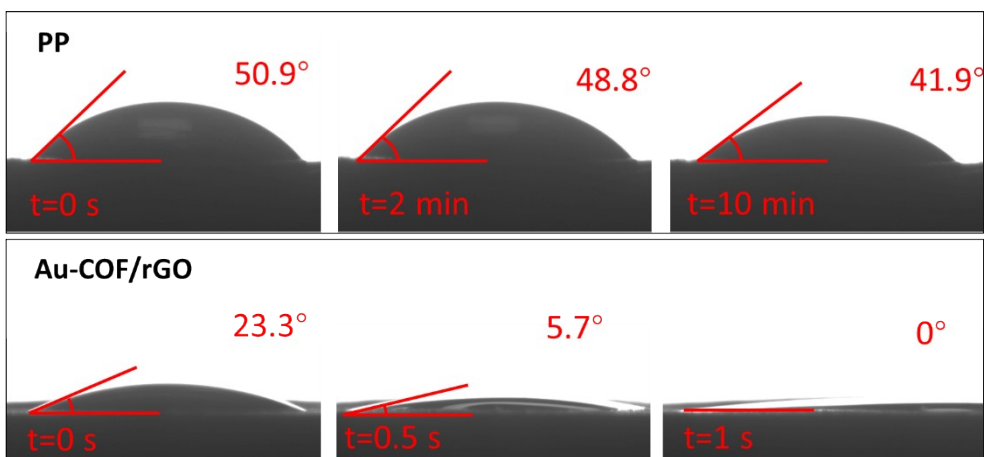

**Fig. S10** Photographs of static liquid electrolyte contact angles of different separators at different rest time. 1 M LiTFSI with 2 wt% LiNO<sub>3</sub> in DOL/DME (v/v=1:1) was used as a liquid electrolyte.

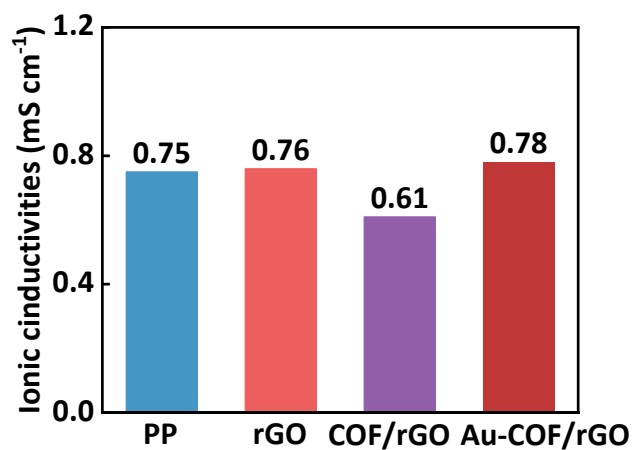

**Fig. S11** Li ion conductivity of symmetric cells with various separators.

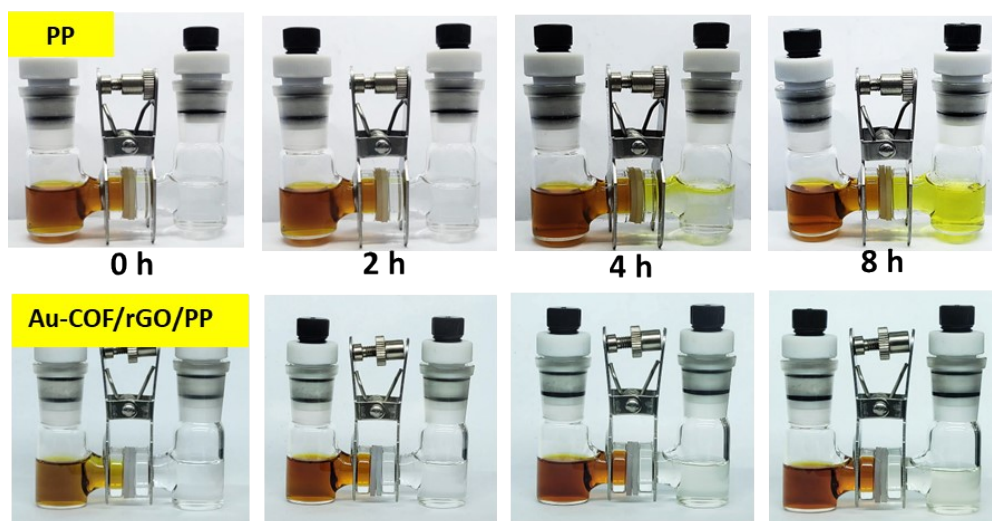

**Fig. S12** Permeation experiments. Digital photographs of H-type devices with original PP separator and Au-COF/rGO coated PP separator. The inside of left chamber is  $\text{Li}_2\text{S}_6$  in DOL/DME (v/v=1:1) solution, while the inside of right chamber is the pure DOL/DME (v/v=1:1) solvent.

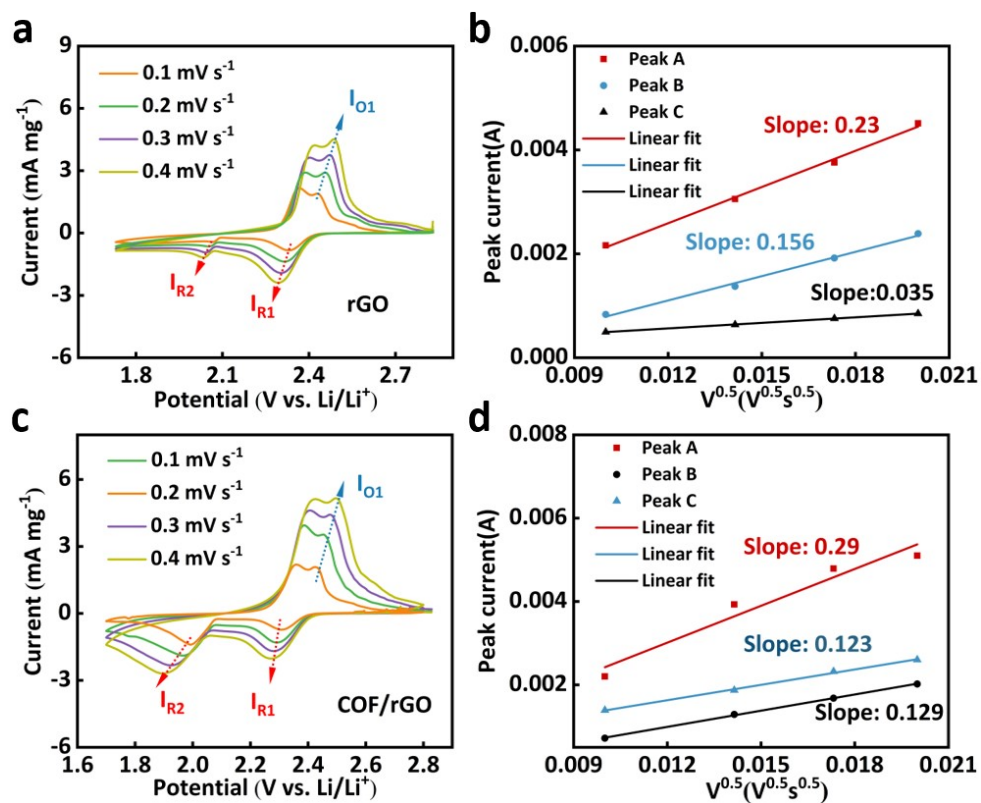

**Fig. S13** CV curves at different scan rates and the corresponding linear fits of the peak current of the cells with the (a, b) rGO and (c, d) COF/rGO separators.

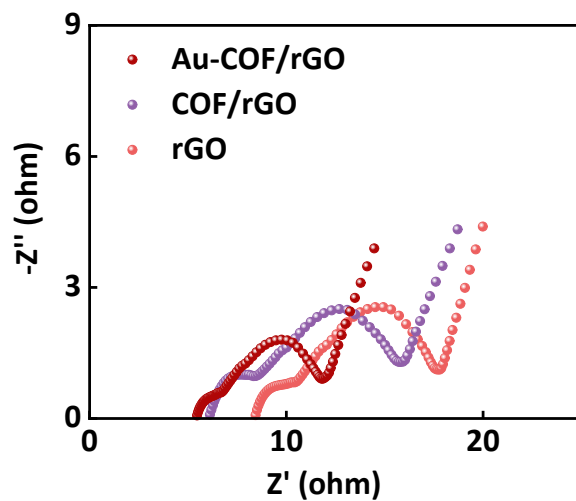

**Fig. S14** EIS curves of Au-COF/rGO, COF/rGO and rGO symmetry cells.



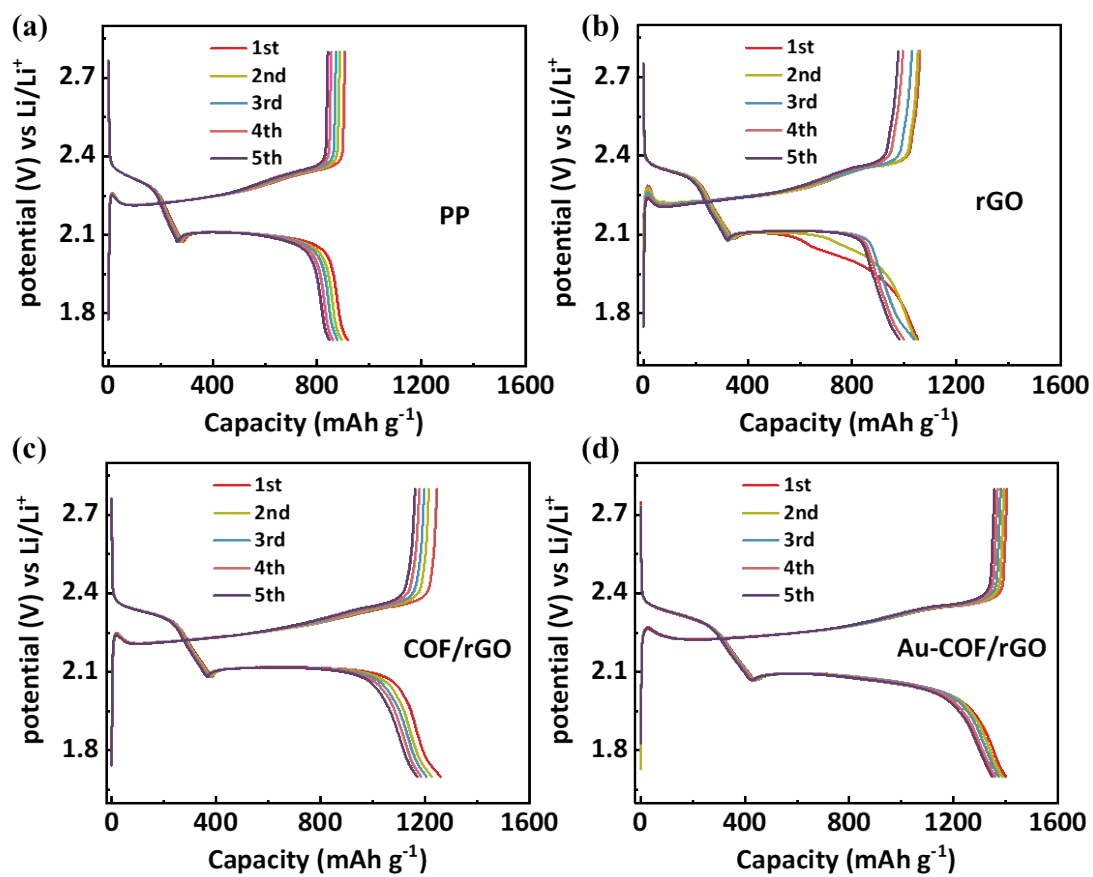

**Fig. S15** First five charge-discharge curves of the Li-S batteries with various separators at 0.2 C.

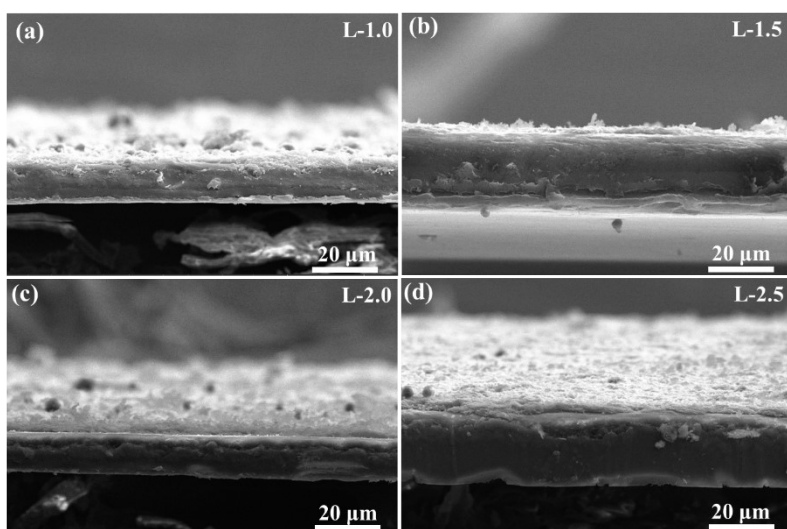

**Fig. S16** Side-view SEM images of the Au-COF/rGO layer with different thickness, which was constructed by adjusting the total loading amount of the three components based on the mass ratio of Au: COF: rGO=1: 1: 1. The loading amount of Au: COF: rGO: (a) 1.0 mg: 1.0 mg: 1.0 mg; (b) 1.5 mg: 1.5 mg: 1.5 mg; (c) 2.0 mg: 2.0 mg: 2.0 mg; (d) 2.5 mg: 2.5 mg: 2.5 mg.

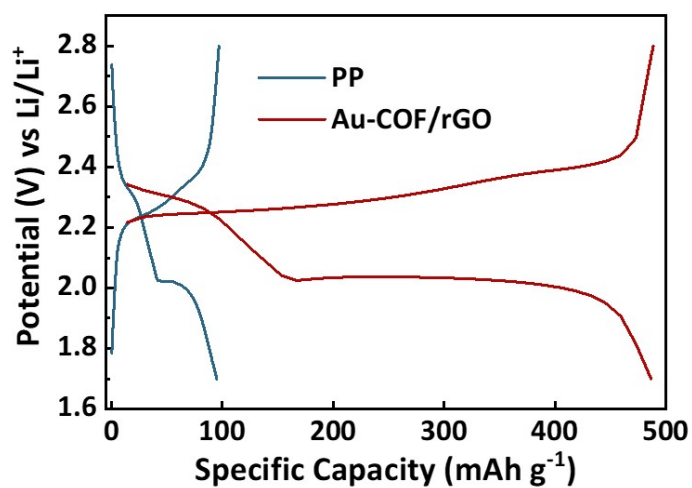

**Fig. S17** Charge-discharge voltage profiles of Li-S cells with different interface after 1000 cycles.

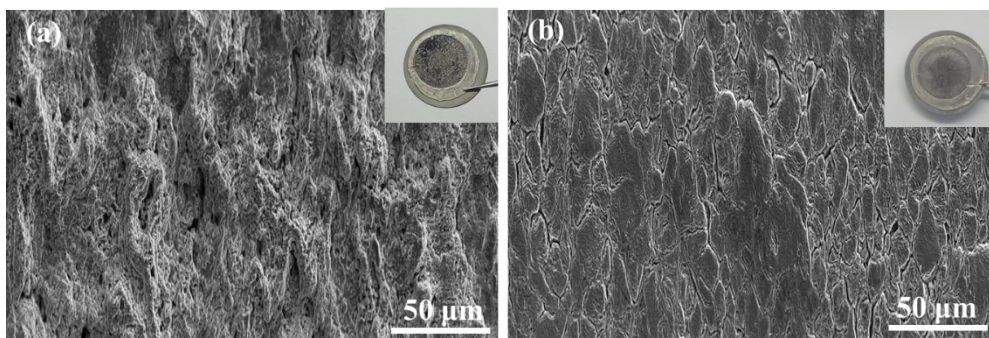

**Fig. S18** SEM images of Li metal anode after cycling in the Li-S cells with different interface: (a) PP; (b) Au-COF/rGO. The inset presents a corresponding digital photo of Li metal anode.

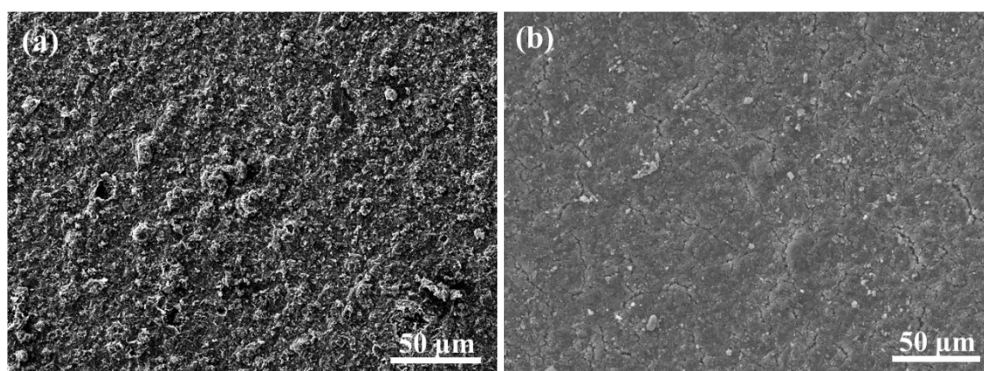

**Fig. S19** SEM images of Au-COF/rGO **a** before and **b** after cycling.

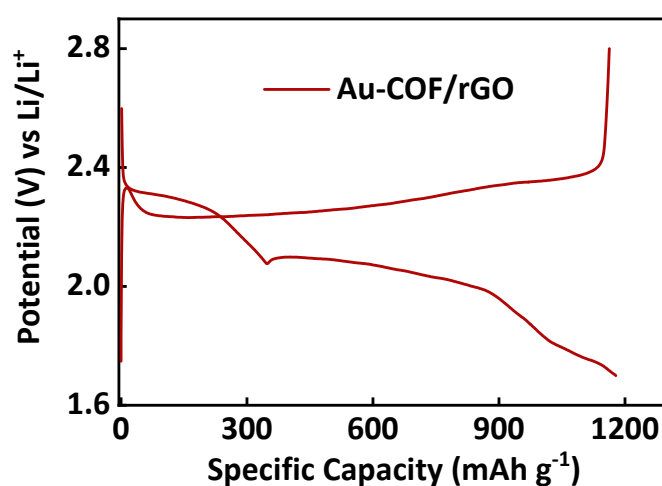

**Fig. S20** Charge-discharge voltage profiles at 0.1 C of Au-COF/rGO-based Li-S cell with a high sulfur loading of  $3.7 \text{ mg cm}^{-2}$ .

**Table S1** Li<sup>+</sup> diffusion coefficients of various separators.

| Separator     | D <sub>Li+</sub> at peak A<br>[cm <sup>2</sup> s <sup>-1</sup> ] | D <sub>Li+</sub> at peak B<br>[cm <sup>2</sup> s <sup>-1</sup> ] | D <sub>Li+</sub> at peak C<br>[cm <sup>2</sup> s <sup>-1</sup> ] |
|---------------|------------------------------------------------------------------|------------------------------------------------------------------|------------------------------------------------------------------|
| PP            | 6.3×10 <sup>-8</sup>                                             | 1.9×10 <sup>-8</sup>                                             | 9.5×10 <sup>-9</sup>                                             |
| rGO/PP        | 1.0×10 <sup>-7</sup>                                             | 4.7×10 <sup>-8</sup>                                             | 2.4×10 <sup>-9</sup>                                             |
| COF/rGO/PP    | 1.6×10 <sup>-7</sup>                                             | 2.9×10 <sup>-8</sup>                                             | 3.2×10 <sup>-8</sup>                                             |
| Au-COF/rGO/PP | 2.3×10 <sup>-7</sup>                                             | 3.3×10 <sup>-8</sup>                                             | 2.9×10 <sup>-8</sup>                                             |

**Table S2** Discharge specific capacity of the Li-S cells with different mass ratios of Au decorated COF/rGO interface.

| Separator     | Original capacity<br>(mA h g <sup>-1</sup> ) | Capacity after 500<br>cycles (mA h g <sup>-1</sup> ) | Capacity decay<br>rate (%) |
|---------------|----------------------------------------------|------------------------------------------------------|----------------------------|
| 0.5Au-COF/rGO | 1204                                         | 458                                                  | 0.124                      |
| 1.0Au-COF/rGO | 1221                                         | 719                                                  | 0.082                      |
| 1.5Au-COF/rGO | 1265                                         | 515                                                  | 0.119                      |
| 2.0Au-COF/rGO | 1135                                         | 452                                                  | 0.120                      |

**Table S3** Discharge specific capacity of the Li-S cells with Au-COF/rGO interface in different thicknesses based on the mass ratio of Au: COF: rGO=1: 1: 1.

| Separator | Original capacity<br>(mA h g <sup>-1</sup> ) | Capacity after 500<br>cycles (mA h g <sup>-1</sup> ) | Capacity decay<br>rate(%) |
|-----------|----------------------------------------------|------------------------------------------------------|---------------------------|
| L-1.0     | 1094                                         | 458                                                  | 0.162                     |
| L-1.5     | 1221                                         | 719                                                  | 0.082                     |
| L-2.0     | 1137                                         | 536                                                  | 0.163                     |
| L-2.5     | 883                                          | 369                                                  | 0.163                     |

**Table S4** The comprehensive comparison of the electrochemical performance of Li-S cells with various interface/separators.

| Separator                           | Max Capacity (mA h g <sup>-1</sup> ) | Rate Capacity (mA h g <sup>-1</sup> ) | Cycling Performance |              |                            | Reference        |
|-------------------------------------|--------------------------------------|---------------------------------------|---------------------|--------------|----------------------------|------------------|
|                                     |                                      |                                       | Rate                | Cycle Number | Capacity Fading Rate/Cycle |                  |
| SCOF-2                              | 1219 (0.1 C)                         | 470 (5 C)                             | 1 C                 | 800          | 0.047%                     | S1               |
| S/D-[4+3]COFs2-3                    | 1350 (0.1 C)                         | 632 (2.5 C)                           | 0.5 C               | 500          | 0.03%                      | S2               |
| Li-CON@GN/Celgard                   | 1622 (0.1 C)                         | 782 (4 C)                             | 1 C                 | 600          | 0.057%                     | S3               |
| COF-1NN                             | 1120 (0.2 C)                         | 580 (10 C)                            | 2 C                 | 300          | 0.053%                     | S4               |
| R-COF BTD@S                         | 1600 (0.1 C)                         | 700 (2 C)                             | 0.5 C               | 200          | 0.012%                     | S5               |
| TPB-DMIP-COF                        | 880 (0.5 C)                          | 480 (2.5 C)                           | 1 C                 | 800          | 0.05%                      | S6               |
| TpPa-SO <sub>3</sub> Li/CNT/Celgard | 1590 (0.1 C)                         | 610 (4 C)                             | 4 C                 | 400          | 0.039%                     | S7               |
| TpPa-SO <sub>3</sub> H@PP           | 1290 (0.1 C)                         | 490 (4 C)                             | 1 C                 | 500          | 0.05%                      | S8               |
| CTP-1                               | 1500 (0.05 C)                        | 600 (5 C)                             | 1 C                 | 800          | 0.048%                     | S9               |
| <b>Au-COF/rGO</b>                   | <b>1420 (0.2 C)</b>                  | <b>568 (4 C)</b>                      | <b>1 C</b>          | <b>1000</b>  | <b>0.047%</b>              | <b>This work</b> |

**Table S5** The comprehensive comparison of the electrochemical performance of Li-S cells with various functional interface/separators at high sulfur loading.

| Separator                 | Cycling Performance |                                      |              |                                       |                            | Reference        |
|---------------------------|---------------------|--------------------------------------|--------------|---------------------------------------|----------------------------|------------------|
|                           | Rate (C)            | Max Capacity (mA h g <sup>-1</sup> ) | Cycle Number | Sulfur loading (mg cm <sup>-2</sup> ) | Capacity Fading Rate/Cycle |                  |
| SCOF-2                    | 0.2                 | 855                                  | 100          | 3.2                                   | 82.5%                      | S1               |
| TpPa-SO <sub>3</sub> H@PP | 0.2                 | 800                                  | 100          | 5.0                                   | 75.0%                      | S8               |
| COF-TPT(OH)@S             | 0.1                 | 1080                                 | 10           | 5.0                                   | 90.1%                      | S10              |
| COF-MF@S                  | 0.2                 | 905                                  | 150          | 3.7                                   | 80.3%                      | S11              |
| COF-PDA/SWCNT             | 0.1                 | 922                                  | 60           | 4.5                                   | 75.5%                      | S12              |
| 4F-COF                    | 0.05                | 844                                  | 200          | 9.0                                   | 74.0%                      | S13              |
| S/D- [4+3] COFs2-3        | 0.5                 | 795                                  | 50           | 4.0                                   | 74.0%                      | S14              |
| COF66                     | 0.2                 | 1015                                 | 100          | 3.6                                   | 76.5%                      | S15              |
| <b>Au-COF/rGO</b>         | <b>0.1</b>          | <b>1162</b>                          | <b>50</b>    | <b>3.7</b>                            | <b>82.8%</b>               | <b>This work</b> |

## Supporting References

- S1. J. Xu, S. An, X. Song, Y. Cao, N. Wang, X. Qiu, Y. Zhang, J. Chen, X. Duan and J. Huang, *Adv. Mater.*, 2021, **33**, 2105178.
- S2. Q. Wang, K. Tang, Q. Liao, Y. Xu, H. Xu, Y. Wang, P. Wang, Z. Meng and K. Xi, *Adv. Funct. Mater.*, 2023, **33**, 2211356.
- S3. Y. Cao, C. Liu, M. Wang, H. Yang, S. Liu, H. Wang, Z. Yang, F. Pan, Z. Jiang and J. Sun, *Energy Stor. Mater.*, 2020, **29**, 207-215.
- S4. J. Yoo, S.-J. Cho, G. Y. Jung, S. H. Kim, K.-H. Choi, J.-H. Kim, C. K. Lee, S. K. Kwak and S.-Y. Lee, *Nano Lett.*, 2016, **16**, 3292-3300.
- S5. Y. Ge, Y. Meng, L. Liu, J. Li, X. Huang and D. Xiao, *Green Energy Environ.*, 2023.
- S6. Y. Yang, X.-J. Hong, C.-L. Song, G.-H. Li, Y.-X. Zheng, D.-D. Zhou, M. Zhang, Y.-P. Cai and H. Wang, *J. Mater. Chem. A*, 2019, **7**, 16323-16329.
- S7. Y. Cao, H. Wu, G. Li, C. Liu, L. Cao, Y. Zhang, W. Bao, H. Wang, Y. Yao and S. Liu, *Nano Lett.*, 2021, **21**, 2997-3006.
- S8. J. Zhao, G. Yan, X. Zhang, Y. Feng, N. Li, J. Shi and X. Qu, *Chem. Eng. J.*, 2022, **442**, 136352.
- S9. J. Xu, F. Yu, J. Hua, W. Tang, C. Yang, S. Hu, S. Zhao, X. Zhang, Z. Xin and D. Niu, *Chem. Eng. J.*, 2020, **392**, 123694.
- S10. Y. Ge, J. Li, Y. Meng and D. Xiao, *Nano Energy*, 2023, **109**, 108297.
- S11. X. Hu, J. Jian, Z. Fang, L. Zhong, Z. Yuan, M. Yang, S. Ren, Q. Zhang, X. Chen and D. Yu, *Energy Stor. Mater.*, 2019, **22**, 40-47.

- S12. L. Han, Y. Yang, S. Sun, J. Yue and J. Li, *ACS Sustain. Chem. Eng.*, 2023.
- S13. K. Zhang, X. Li, L. Ma, F. Chen, Z. Chen, Y. Yuan, Y. Zhao, J. Yang, J. Liu and K. Xie, *ACS Nano*, 2023, **17**, 2901-2911.
- S14. Q. Wang, K. Tang, Q. Liao, Y. Xu, H. Xu, Y. Wang, P. Wang, Z. Meng and K. Xi, *Adv. Funct. Mater.*, 2023, **33**, 2211356.
- S15. J. Xu, W. Tang, C. Yang, I. Manke, N. Chen, F. Lai, T. Xu, S. An, H. Liu and Z. Zhang, *ACS Energy Lett.*, 2021, **6**, 3053-3062.
